# Supplementary material
Source: Elsevier journal article supplement (https://www.sciencedirect.com/science/article/pii/S0211699516300066)
Supplement: mmc2 [file S0211699516300066:mmc2.pdf]

**SUPPLEMENTARY TABLE 1.** Comparison by gender as a function of CKD-T stages. Mean and standard deviation or median and interquartile range as appropriate.

|                                     | CKD-T STAGE I/II<br>(94 M; 42F) | CKD-T STAGE III<br>(233M;143F) | CKD-T STAGE IV<br>(105M; 93F) | CKD-T STAGE V<br>(5M;12F) | P<br>(Males vs Females at each Stage) |
|-------------------------------------|---------------------------------|--------------------------------|-------------------------------|---------------------------|---------------------------------------|
| Age (yrs)                           |                                 |                                |                               |                           |                                       |
| Males                               | 50 (146)                        | 56 (13)                        | 58 (13)                       | 46 (12)                   | 0.2; 0.5; 0.6; 0.08                   |
| Females                             | 53 (10)                         | 55 (13)                        | 57 (13)                       | 56 (9)                    |                                       |
| Time on dialysis (months)           |                                 |                                |                               |                           |                                       |
| Males                               | 20 (11–42)                      | 23 (12–40)                     | 25 (14–39)                    | 18 (8–36)                 | 0.9; 0.1; 0.07; 0.3                   |
| Females                             | 23 (10–38)                      | 20 (10–37)                     | 18 (11–37)                    | 32 (15–139)               |                                       |
| Time since Transplantation (months) |                                 |                                |                               |                           |                                       |
| Males                               | 64 (30)                         | 68 (31)                        | 74 (31)                       | 95 (23)                   | 0.9; 0.3; 0.6; 0.007                  |
| Females                             | 64 (30)                         | 71 (33)                        | 76 (30)                       | 53 (26)                   |                                       |
| History of Cardiovascular Disease   |                                 |                                |                               |                           |                                       |
| Males vs Females                    | 15% vs 14%                      | 25% vs 18%                     | 22% vs 15%                    | 60% vs 0%                 | 1; 0.1; 0.3; 0.02                     |

|                                   |            |            |            |              |                    |
|-----------------------------------|------------|------------|------------|--------------|--------------------|
| BMI (Kg/m <sup>2</sup> )          |            |            |            |              |                    |
| Males                             | 26 (4)     | 27 (4)     | 27 (4)     | 25 (3)       | 0.2; 0.5; 0.1; 0.5 |
| Females                           | 25 (4)     | 26 (5)     | 28 (6)     | 24 (2)       |                    |
| Pretransplant DM or NODAT (%)     |            |            |            |              |                    |
| Males vs Females                  | 26% vs 24% | 27% vs 20% | 26% vs 32% | 0% vs 17%    | 1; 0.1; 0.4; 1     |
| Parathyroidectomy (%)             |            |            |            |              |                    |
| Pretransplant: Males vs Females   | 3% vs 5%   | 4% vs 8%   | 4% vs 6%   | 0% vs 27%    | 0.7; 0.2; 0.7; 0.5 |
| Post-transplant: Males vs Females | 1% vs 0%   | 1% vs 1%   | 0% vs 1%   | 0% vs 0%     | 1; 1; 0.5; 1       |
| Patients on steroids (%)          |            |            |            |              |                    |
| Males vs Females                  | 65% vs 52% | 74% vs 66% | 79% vs 83% | 100% vs 100% | 0.2; 0.1; 0.6; 1   |

|                                   |            |            |            |            |                      |
|-----------------------------------|------------|------------|------------|------------|----------------------|
| Current prednisone dose (mg/day)  |            |            |            |            |                      |
| Males                             | 3 (0–5)    | 5 (0–5)    | 5 (2.5–5)  | 5 (5–7.5)  | 0.08; 0.03; 0.8; 0.8 |
| Females                           | 2.5 (0–5)  | 4 (0–5)    | 5 (2.5–5)  | 5 (5–5)    |                      |
| Tacrolimus: Males vs Females      | 82% vs 71% | 67% vs 76% | 72 vs 66%  | 80% vs 75% | 0.2; 0.03; 0.4; 1    |
| CsA: Males vs Females             | 7% vs 14%  | 16% vs 11% | 15% vs 14% | 20% vs 8%  | 0.2; 0.2; 0.8; 0.5   |
| mTORi: Males vs Females (%)       | 15% vs 15% | 20% vs 12% | 11% vs 21% | 0% vs 25%  | 0.2; 0.06; 0.05; 0.5 |
| Patients on MMF (%)               |            |            |            |            |                      |
| Males vs Females                  | 83% vs 93% | 85% vs 87% | 82% vs 81% | 10% vs 42% | 0.2; 0.7; 0.5; 0.04  |
| Acute Rejection (%)               |            |            |            |            |                      |
| Males vs Females                  | 11% vs 5%  | 21% vs 17% | 23% vs 30% | 40% vs 46% | 0.3; 0.3; 0.3; 1     |
| MDRD (ml/mn/1.73 m <sup>2</sup> ) |            |            |            |            |                      |
| Males                             | 76 (12)    | 43 (8)     | 24 (4)     | 12 (1)     | 0.2; 0.6; 0.6; 0.5   |
| Females                           | 74 (13)    | 43 (9)     | 24 (4)     | 13 (3)     |                      |

|                                                               |            |            |            |            |                      |
|---------------------------------------------------------------|------------|------------|------------|------------|----------------------|
| Patients on Oral Calcium (as a supplement or as a binder) (%) |            |            |            |            |                      |
| Males vs Females                                              | 12% vs 14% | 17% vs 25% | 28% vs 25% | 60% vs 67% | 0.8; 0.06; 0.8; 1    |
| Patients on Vitamin D supplements (%)                         |            |            |            |            |                      |
| Males vs Females                                              | 12% vs 17% | 17% vs 23% | 24% vs 26% | 0% vs 33%  | 0.4; 0.1; 0.9; 0.3   |
| Patients on Calcitriol Males vs Females (%)                   | 8% vs 10%  | 17% vs 23% | 24% vs 26% | 0% vs 33%  | 0.4; 0.1; 0.9; 0.3   |
| Patients on Paricalcitol: Males vs Females (%)                | 1% vs 0%   | 1% vs 2%   | 8% vs 5%   | 20% vs 25% | 1; 0.4; 0.6; 1       |
| Patients on Calcimimetic (%)                                  |            |            |            |            |                      |
| Males vs Females                                              | 4% vs 17%  | 7% vs 10%  | 12% vs 7%  | 20% vs 17% | 0.04; 0.3; 0.2; 1    |
| Patients on Bisphosphonates (%)                               |            |            |            |            |                      |
| Males vs Females                                              | 4% vs 10%  | 4% vs 10%  | 4% vs 11%  | 20% vs 0%  | 0.3; 0.01; 0.09; 1   |
| Corrected total Ca (mg/dl)                                    |            |            |            |            |                      |
| Males                                                         | 9.4 (0.4)  | 9.5 (0.5)  | 9.3 (0.6)  | 9 (0.8)    | 0.01; 0.02; 0.3; 0.4 |
| Females                                                       | 9.7 (0.5)  | 9.6 (0.5)  | 9.5 (0.8)  | 9.4 (0.8)  |                      |

|                            |             |              |               |               |                      |
|----------------------------|-------------|--------------|---------------|---------------|----------------------|
| Phosphate (mg/dl)          |             |              |               |               |                      |
| Males                      | 3.1 (0.6)   | 3.2 (0.6)    | 3.8 (0.8)     | 5.5 (0.7)     | 0.02; 0.01; 0.1; 0.1 |
| Females                    | 3.3 (0.4)   | 3.5 (0.7)    | 3.9 (0.8)     | 4.7 (0.9)     |                      |
| Total AP (U/L)             |             |              |               |               |                      |
| Males                      | 81 (33)     | 81 (28)      | 86 (43)       | 59 (9)        | 1; 0.6; 0.05; 0.1    |
| Females                    | 81 (29)     | 83 (38)      | 75 (30)       | 89 (36)       |                      |
| Bone AP (pg/ml)            |             |              |               |               |                      |
| Males                      | 12 (10–15)  | 12 (9–16)    | 13 (10–19)    | 9 (7–16)      | 0.8; 0.2; 0.03; 0.2  |
| Females                    | 12 (9–18)   | 13 (9–16)    | 11 (9–16)     | 15 (10–19)    |                      |
| PTH (pg/ml)                |             |              |               |               |                      |
| Males                      | 73 (60–110) | 110 (75–180) | 190 (106–342) | 460 (287–741) | 0.3; 0.7; 0.5; 0.7   |
| Females                    | 91 (57–127) | 109 (68–173) | 173 (109–277] | 337 (195–613) |                      |
| 25OHD <sub>3</sub> (ng/ml) |             |              |               |               |                      |
| Males                      | 19 (14–26)  | 19 (14–19)   | 18 (12–23)    | 12 (7–12)     | 0.2; 0.01; 0.2; 0.8  |
| Females                    | 16 (12–23)  | 16 (11–24)   | 16 (11–21)    | 11 (8–11)     |                      |

|                                               |            |            |            |            |                     |
|-----------------------------------------------|------------|------------|------------|------------|---------------------|
| 1.25 (OH) <sub>2</sub> D <sub>3</sub> (pg/ml) |            |            |            |            |                     |
| Males                                         | 51 [39-62] | 38 [30-54] | 28 [21-40] | 18 [10-23] | 1; 0.4; 0.6; 0.7    |
| Females                                       | 51 [36-63] | 37 [28-50] | 28 [19-36] | 18 [12-36] |                     |
| History of clinical fractures (%)             |            |            |            |            |                     |
| Pretransplant: Males vs Females               | 1% vs 2%   | 2% vs 2%   | 2% vs 3%   | 20% vs 0%  | 0.5; 1; 0.7; 0.3    |
| Post-transplant: Males vs Females             | 1% vs 5%   | 2% vs 5%   | 1% vs 7%   | 20% vs 0%  | 0.2; 0.2; 0.06; 0.3 |
| Vertebral deformity ≥grade 2 (%)              |            |            |            |            |                     |
| Males vs Females                              | 18% vs 3%  | 19% vs 11% | 12% vs 14% | 20% vs 11% | 0.06; 0.06; 0.8; 1  |
| Abdominal Aortic Calcification score >0 (%)   |            |            |            |            |                     |
| Males vs Females                              | 56% vs 58% | 69% vs 66% | 72% vs 72% | 80% vs 80% | 1; 0.7; 1; 1        |
| Pulse Pressure (mm Hg)                        |            |            |            |            |                     |
| Males                                         | 52 (12)    | 58 (15)    | 61 (16)    | 72 (18)    | 0.5; 0.5; 0.4; 0.2  |
| Females                                       | 50 (15)    | 57 (18)    | 63 (20)    | 61 (14)    |                     |

CKD-T Stages: I >90; II 60-89; III 30-59; IV 15-29; V <15 ml/mn/1.73 m<sup>2</sup>. NODAT: new onset diabetes after transplantation. AP: Alkaline Phosphatase. 25 (OH)D<sub>3</sub>: patients not receiving vitamin D supplements (359 males and 221 females).
